# Supplementary material
Source: PubMed Central journal article supplement (PMC7959917)
Supplement: 16-01198.pdf [file 16-01198.pdf]

**On-line Table 1: Full search strategy<sup>a</sup>**

| Data Bases         | Terms                                                                                                                                                                                         |
|--------------------|-----------------------------------------------------------------------------------------------------------------------------------------------------------------------------------------------|
| PubMed/MEDLINE     |                                                                                                                                                                                               |
| MeSH terms         | glioma perfusion, magnetic resonance imaging, astrocytoma, oligodendroglioma                                                                                                                  |
| Other search terms | grade, grading, DSC, oligoastrocytoma                                                                                                                                                         |
| Hits               | 1458                                                                                                                                                                                          |
| EMBASE             |                                                                                                                                                                                               |
| P                  | glioma, brain glioma, cerebral glioma, glia tumor, glia tumour, glial tumor, glial tumour, high grade glioma, low grade glioma                                                                |
| I                  | perfusion-weighted imaging, perfusion MRI, perfusion magnetic resonance imaging, perfusion-weighted MRI, perfusion-weighted magnetic resonance, perfusion-weighted magnetic resonance imaging |
| C                  | histopathology, neuropathology, histopathological study, neurohistopathology                                                                                                                  |
| O                  | NA                                                                                                                                                                                            |
| Hits               | 172                                                                                                                                                                                           |
| Web of Science     |                                                                                                                                                                                               |
| Search terms       | glioma, perfusion, magnetic resonance imaging                                                                                                                                                 |
| Hits               | 283                                                                                                                                                                                           |
| ClinicalTrials.gov |                                                                                                                                                                                               |
| Search terms       | glioma, perfusion                                                                                                                                                                             |
| Hits               | 64                                                                                                                                                                                            |

**Note:**—P indicates patient; I, intervention; C, comparison; O, outcome; MeSH, Medical Subject Heading; NA, not applicable.

<sup>a</sup>The search was performed in October 2016.

**On-line Table 2: References of included studies in the meta-analysis (n = 28)**

| No. | First 3 Authors                                | Journal, Year, Edition, Pages                                   |
|-----|------------------------------------------------|-----------------------------------------------------------------|
| 1   | Bisdas S, Kirkpatrick M, Giglio P, et al       | <i>AJNR American Journal of Neuroradiology</i> 2009;30:681–88   |
| 2   | Blasel S, Franz K, Mittelbronn M, et al        | <i>Neurosurgical Review</i> 2010;33:193–203; discussion 203–194 |
| 3   | Boxerman JL, Schmainda KM, Weisskoff RM        | <i>AJNR American Journal of Neuroradiology</i> 2006;27:859–67   |
| 4   | Catalaa I, Henry R, Dillon WP, et al           | <i>NMR in Biomedicine</i> 2006;19:463–75                        |
| 5   | Caulo M, Panara V, Tortora D, et al            | <i>Radiology</i> 2014;272:494–503                               |
| 6   | Chaskis C, Stadnik T, Michotte A, et al        | <i>Acta Neurochirurgica</i> 2006;148:277–85; discussion 285     |
| 7   | Cuccarini V, Erbetta A, Farinotti M, et al     | <i>Journal of Neuro-Oncology</i> 2016;126:279–88                |
| 8   | Falk A, Fahlström M, Rostrop E, et al          | <i>Neuroradiology</i> 2014;56:1031–38                           |
| 9   | Fellah S, Caudal D, De Paula AM, et al         | <i>AJNR American Journal of Neuroradiology</i> 2013;34:1326–33  |
| 10  | Hakyemez B, Erdogan C, Ercan I, et al          | <i>Clinical Radiology</i> 2005;60:493–502                       |
| 11  | Hilario A, Ramos A, Perez-Nuñez A, et al       | <i>AJNR American Journal of Neuroradiology</i> 2012;33:701–07   |
| 12  | Kapoor GS, Gocke TA, Chawla S, et al           | <i>Journal of Neuro-Oncology</i> 2009;92:373–86                 |
| 13  | Kim H, Choi SH, Kim JH, et al                  | <i>PLoS One</i> 2013;8:e63462                                   |
| 14  | Law M, Young R, Babb J, et al                  | <i>AJNR American Journal of Neuroradiology</i> 2007;28:761–66   |
| 15  | Lee SJ, Kim JH, Kim YM, et al                  | <i>Korean Journal of Radiology</i> 2001;2:1–7                   |
| 16  | Maia AC Jr, Malheiros SM, da Rocha AJ, et al   | <i>AJNR American Journal of Neuroradiology</i> 2005;26:777–83   |
| 17  | Nguyen TB, Cron GO, Perdriet K, et al          | <i>AJNR American Journal of Neuroradiology</i> 2015;36:2017–22  |
| 18  | Preul C, Kühn B, Lang EW, et al                | <i>European Journal of Radiology</i> 2003;48:244–51             |
| 19  | Sadeghi N, Salmon I, Tang BN, et al            | <i>Journal of Magnetic Resonance Imaging</i> 2006;24:989–94     |
| 20  | Saito T, Yamasaki F, Kajiwara Y, et al         | <i>European Journal of Radiology</i> 2012;81:1863–69            |
| 21  | Santarosa C, Castellano A, Conte GM, et al     | <i>European Journal of Radiology</i> 2016;85:1147–56            |
| 22  | Server A, Graff BA, Orheim TE, et al           | <i>Neuroradiology</i> 2011;53:435–47                            |
| 23  | Sugahara T, Korogi Y, Kochi M, et al           | <i>AJR American Journal of Radiology</i> 1998;171:1479–86       |
| 24  | Svolos P, Tsolaki E, Kapsalaki E, et al        | <i>Magnetic Resonance Imaging</i> 2013;31:1567–77               |
| 25  | Thomsen H, Steffensen E, Larsson EM, et al     | <i>Acta Radiologica</i> 2012;53:95–101                          |
| 26  | Tietze A, Mouridsen K, Lassen-Ramshad Y, et al | <i>PLoS One</i> 2015;10:e0123044                                |
| 27  | Wang XC, Zhang H, Tan Y, et al                 | <i>Journal of Magnetic Resonance Imaging</i> 2014;39:1569–74    |
| 28  | Weber MA, Zoubaa S, Schlieter M, et al         | <i>Neurology</i> 2006;66:1899–1906                              |

**On-line Table 3: Results from QUADAS-2 assessment**

| Study Identification |                | Risk of Bias                   |                         |                                 |                 | Applicability Concerns |            |                    |
|----------------------|----------------|--------------------------------|-------------------------|---------------------------------|-----------------|------------------------|------------|--------------------|
| First author         | Year Published | Patient Selection <sup>a</sup> | Index Test <sup>b</sup> | Reference Standard <sup>c</sup> | Flow and Timing | Patient Selection      | Index Test | Reference Standard |
| Bisdas               | 2009           | +                              | +                       | 0                               | 0               | +                      | +          | +                  |
| Blasel               | 2010           | +                              | 0                       | 0                               | 0               | +                      | +          | +                  |
| Boxerman             | 2006           | 0                              | 0                       | 0                               | 0               | +                      | -          | +                  |
| Catalaa              | 2006           | 0                              | 0                       | +                               | 0               | +                      | +          | +                  |
| Caulo                | 2014           | +                              | +                       | 0                               | 0               | +                      | +          | +                  |
| Chaskis              | 2006           | +                              | 0                       | +                               | 0               | +                      | +          | +                  |
| Cuccarini            | 2016           | +                              | +                       | 0                               | +               | +                      | +          | +                  |
| Falk                 | 2014           | +                              | +                       | 0                               | -               | +                      | -          | +                  |
| Fellah               | 2013           | +                              | +                       | 0                               | 0               | +                      | +          | +                  |
| Hakyemez             | 2005           | +                              | -                       | 0                               | 0               | +                      | +          | +                  |
| Hilario              | 2012           | +                              | -                       | 0                               | 0               | +                      | +          | +                  |
| Kapoor               | 2009           | +                              | -                       | 0                               | 0               | +                      | +          | +                  |
| Kim                  | 2013           | +                              | +                       | 0                               | 0               | +                      | -          | +                  |
| Law                  | 2007           | +                              | -                       | 0                               | 0               | +                      | +          | +                  |
| Lee                  | 2001           | +                              | -                       | 0                               | 0               | +                      | +          | +                  |
| Maia                 | 2005           | +                              | 0                       | +                               | 0               | +                      | +          | +                  |
| Nguyen               | 2015           | +                              | +                       | 0                               | +               | +                      | +          | +                  |
| Preul                | 2003           | 0                              | +                       | +                               | +               | +                      | +          | +                  |
| Sadeghi              | 2006           | +                              | 0                       | 0                               | 0               | +                      | +          | +                  |
| Saito                | 2012           | +                              | +                       | +                               | 0               | +                      | +          | +                  |
| Santarosa            | 2016           | 0                              | +                       | 0                               | 0               | +                      | +          | +                  |
| Server               | 2011           | +                              | +                       | 0                               | 0               | +                      | +          | +                  |
| Sugahara             | 1998           | +                              | +                       | 0                               | +               | +                      | +          | +                  |
| Svolos               | 2013           | +                              | +                       | 0                               | +               | +                      | +          | +                  |
| Thomsen              | 2012           | +                              | 0                       | 0                               | 0               | +                      | +          | +                  |
| Tietze               | 2015           | +                              | -                       | 0                               | +               | +                      | +          | +                  |
| Wang                 | 2014           | 0                              | -                       | 0                               | 0               | +                      | +          | +                  |
| Weber                | 2006           | +                              | +                       | 0                               | +               | +                      | +          | +                  |

<sup>a</sup> Positive (+) if consecutive or if the patient selection was adequately explained and a time frame for inclusion was reported. Negative (-) if no information about consecutive enrollment and no time frame were reported. Indeterminate (0) if only time frame was reported.

<sup>b</sup> Positive if reported blinded to index test. Negative if reported unblinded to index test. Indeterminate if no information regarding blinding was reported.

<sup>c</sup> Positive if blinded for reference standard test result. Negative if no information of blinding procedure and if cutoff determination was from actual study data and not a previously set standard. Indeterminate if no information regarding blinding and no calculation of ROC were reported.

**On-line Table 4: Included studies<sup>a</sup>**

| ID | First Author | Year | Study Period | Region      | Perfusion Method | Sequence | Scanner                                 | MRI        | Glioma Classification | Prospective/Retrospective | WHO Grade II (No.) | WHO Grade III (No.) | Glioma Types | ROI Method                                       | Pre-saturation of Tissue (Y/N) | Mathematic Correction for Contrast Agent Leakage (Y/N) | Discrimination between Grades II and III Individual Studies? (Y/N) | rCBVmax Mean (SD) Grade II | rCBVmax Mean (SD) Grade III | Published Patient Data (Y/N) |
|----|--------------|------|--------------|-------------|------------------|----------|-----------------------------------------|------------|-----------------------|---------------------------|--------------------|---------------------|--------------|--------------------------------------------------|--------------------------------|--------------------------------------------------------|--------------------------------------------------------------------|----------------------------|-----------------------------|------------------------------|
| 1  | Bisdas       | 2009 | 2002–2007    | US          | DSC              | GE-EPI   | Intera, Philips <sup>b</sup>            | 1.5T       | WHO NOS               | Retrospective             | 15                 | 7                   | AC/OA/OD     | rCBVmax                                          | N                              | NA                                                     | N                                                                  | 2.93 (1.95)                | 3.26 (2.65)                 | Y                            |
| 2  | Blasel       | 2010 | 2007–2008    | Germany     | DSC              | GE-EPI   | Allegra, Siemens <sup>c</sup>           | 3T         | WHO NOS               | Retrospective             | 12                 | 12                  | AC/OA/OD     | rCBVmax                                          | N                              | NA                                                     | N                                                                  | 4.24 (2.67)                | 4.39 (2.45)                 | N                            |
| 3  | Boxerman     | 2006 | NA           | US          | DSC              | GE-EPI   | Signa, GE <sup>d</sup>                  | 1.5T       | WHO 1993              | NA                        | 9                  | 9                   | AC/OA/OD     | rCBVmax                                          | Y                              | Y, Boxerman                                            | Y                                                                  | 1.39 (0.86)                | 2.84 (1.43)                 | Y                            |
| 4  | Catalaa      | 2006 | NA           | US          | DSC              | GE-EPI   | GE scanner                              | 1.5T       | WHO NOS               | NA                        | 8                  | 9                   | NA           | Histogram analysis, relative 75th percentile CBV | N                              | Y, Boxerman                                            | N                                                                  | 1.81 (0.60)                | 1.80 (0.94)                 | N                            |
| 5  | Caulo        | 2014 | 2008–2012    | Italy       | DSC              | GE-EPI   | Achieva, Philips                        | 3T         | WHO 2007              | Retrospective             | 33                 | 17                  | AC/OA/OD     | rCBVmax                                          | Y                              | NA                                                     | N                                                                  | 1.57 (1.00)                | 2.43 (1.79)                 | N                            |
| 6  | Chaakis      | 2006 | NA           | Belgium     | DSC              | GE-EPI   | Vision, Siemens                         | 1.5T       | WHO 2000              | Prospective               | 9                  | 9                   | AC/OA/OD     | rCBVmax                                          | N                              | NA                                                     | Y                                                                  | 1.21 (0.62)                | 2.44 (1.20)                 | N                            |
| 7  | Cuccarini    | 2016 | 2006–2009    | Italy       | DSC              | DSC NOS  | Avanto, Siemens                         | 1.5T       | WHO 2007              | Prospective               | 40                 | 19                  | AC/OA/OD     | rCBVmax                                          | Y                              | NA                                                     | N                                                                  | 1.60 (1.50)                | 1.60 (0.90)                 | N                            |
| 8  | Falk         | 2014 | 2010–2012    | Sweden      | DSC              | GE-EPI   | Achieva, Philips                        | 3T         | WHO 2007              | Prospective               | 18                 | 7                   | AC/OA/OD     | Histogram analysis, relative 90th percentile CBV | Y                              | Y, Boxerman                                            | N                                                                  | 1.67 (0.78)                | 2.91 (1.79)                 | Y                            |
| 9  | Fellah       | 2013 | 2006–2010    | France      | DSC              | GE-EPI   | Symphony, Siemens                       | 1.5T       | WHO 2007              | Retrospective             | 24                 | 26                  | OA/OD        | rCBVmax                                          | N                              | Y                                                      | Y                                                                  | 1.57 (0.82)                | 3.89 (1.97)                 | N                            |
| 10 | Hakymez      | 2005 | 2002–2003    | Turkey      | DSC              | GE-EPI   | Signa, GE                               | 1.5T       | WHO NOS               | Prospective               | 8                  | 4                   | AC/OA/OD     | rCBVmax                                          | Y                              | NA                                                     | Y                                                                  | 1.51 (0.37)                | 5.46 (1.85)                 | Y                            |
| 11 | Hilario      | 2012 | 2006–2010    | Spain       | DSC              | GE-EPI   | Signa, GE                               | 1.5T       | WHO 2007              | Retrospective             | 32                 | 29                  | AC/OA/OD     | rCBVmax                                          | Y                              | NA                                                     | Y                                                                  | 2.36 (1.44)                | 3.77 (2.82)                 | Y                            |
| 12 | Kapoor       | 2009 | 2003–2008    | US          | DSC              | GE-EPI   | Tim Trio, Siemens                       | 1.5T or 3T | WHO NOS               | Retrospective             | 14                 | 15                  | OA/OD        | rCBVmax                                          | Y                              | NA                                                     | Y                                                                  | 1.89 (0.97)                | 3.26 (2.23)                 | Y                            |
| 13 | Kim          | 2013 | 2010–2012    | South Korea | DSC              | GE-EPI   | Verio, Siemens                          | 3T         | WHO NOS               | Retrospective             | 9                  | 16                  | AC           | Histogram analysis, relative 99th percentile CBV | N                              | Y, Boxerman                                            | N                                                                  | 3.55 (0.55)                | 4.16 (1.42)                 | N                            |
| 14 | Law          | 2007 | 1999–2003    | US          | DSC              | GE-EPI   | Sonata Vision, Avanto/Symphony, Siemens | 1.5T       | WHO NOS               | Retrospective             | 31                 | 30                  | AC           | rCBVmax                                          | N                              | NA                                                     | Y                                                                  | 1.51 (0.64)                | 5.03 (3.47)                 | N                            |
| 15 | Lee          | 2001 | NA           | Korea       | DSC              | GE-EPI   | 63SP system, Siemens                    | 1.5T       | WHO 1993              | Retrospective             | 4                  | 9                   | AC/OA/OD     | rCBVmax                                          | N                              | NA                                                     | Y                                                                  | 1.75 (1.51)                | 3.97 (0.56)                 | Y                            |
| 16 | Maia         | 2005 | 2001–2004    | Brazil      | DSC              | SE-EPI   | NA                                      | 1.5T       | WHO 2000              | NA                        | 14                 | 7                   | AC/OA/OD     | rCBVmax                                          | N                              | NA                                                     | Y                                                                  | 1.39 (0.74)                | 3.48 (0.35)                 | Y                            |
| 17 | Nguyen       | 2015 | 2011–2013    | Canada      | DSC              | GE-EPI   | Tim Trio, Siemens                       | 3T         | WHO 2007              | Prospective               | 9                  | 11                  | AC/OA        | rCBVmax                                          | Y                              | Y, Boxerman                                            | N                                                                  | 2.38 (1.30)                | 5.04 (7.38)                 | N                            |
| 18 | Preul        | 2003 | NA           | Germany     | DSC              | GE-EPI   | Magnetom, Siemens                       | 1.5T       | WHO NOS               | Prospective               | 3                  | 13                  | AC/OA        | rCBVmax                                          | N                              | NA                                                     | Y                                                                  | 1.27 (0.76)                | 3.97 (1.23)                 | Y                            |
| 19 | Sadeghi      | 2006 | NA           | Belgium     | DSC              | GE-EPI   | Gyrosan NT, Philips                     | 1.5T       | WHO 1993              | NA                        | 8                  | 3                   | AC/OA/OD     | rCBVmax                                          | N                              | NA                                                     | Y                                                                  | 2.49 (1.20)                | 4.61 (3.37)                 | Y                            |
| 20 | Saito        | 2012 | 2006–2009    | Japan       | DSC              | GE-EPI   | Signa, GE                               | 3T         | WHO 2007              | Retrospective             | 13                 | 11                  | AC/OA/OD     | rCBVmax                                          | N                              | NA                                                     | N                                                                  | 4.11 (1.88)                | 4.45 (1.98)                 | Y                            |
| 21 | Santarosa    | 2016 | NA           | Italy       | DSC              | GE-EPI   | Achieva, Philips                        | 3T         | WHO 2007              | Prospective               | 9                  | 4                   | AC/OA/OD     | rCBVmax                                          | Y                              | Y, Boxerman                                            | N                                                                  | 1.20 (1.05)                | 6.40 (1.20)                 | N                            |
| 22 | Server       | 2011 | NA           | Norway      | DSC              | GE-EPI   | Signa, GE                               | 3T         | WHO 2007              | Prospective               | 18                 | 14                  | AC/OA/OD     | rCBVmax                                          | N                              | Y, Boxerman                                            | Y                                                                  | 2.42 (1.17)                | 5.46 (2.17)                 | Y                            |
| 23 | Sugahara     | 1998 | 1996–1997    | Japan       | DSC              | GE-EPI   | Magnetom, Siemens                       | 1.5T       | WHO 1993              | Prospective               | 4                  | 14                  | AC/OA/OD     | rCBVmax                                          | N                              | NA                                                     | Y                                                                  | 1.26 (0.55)                | 4.61 (1.33)                 | N                            |
| 24 | Svolos       | 2013 | NA           | Greece      | DSC              | GE-EPI   | Signa, GE                               | 3T         | NA                    | Prospective               | 13                 | 12                  | NA           | rCBVmax                                          | Y                              | NA                                                     | Y                                                                  | 2.33 (0.79)                | 4.32 (1.06)                 | N                            |
| 25 | Thomsen      | 2012 | 2006–2008    | Denmark     | DSC              | GE-EPI   | Signa, GE                               | 1.5T or 3T | WHO 2007              | Retrospective             | 2                  | 4                   | AC           | rCBVmax                                          | N                              | Y, Boxerman                                            | N                                                                  | 4.40 (5.20)                | 4.13 (3.91)                 | N                            |
| 26 | Tietze       | 2015 | 2010–2012    | Denmark     | DSC              | GE-EPI   | Achieva, Philips                        | 3T         | NA                    | Retrospective             | 3                  | 5                   | OD           | rCBVmax                                          | Y                              | Y, Mouridsen <sup>f</sup>                              | N                                                                  | 4.06 (3.09)                | 4.48 (2.22)                 | N                            |
| 27 | Wang         | 2014 | NA           | China       | DSC              | GE-EPI   | Avanto, Siemens                         | 1.5T       | WHO 2007              | Retrospective             | 18                 | 11                  | AC           | rCBVmax                                          | N                              | NA                                                     | Y                                                                  | 1.27 (0.44)                | 4.01 (2.20)                 | N                            |
| 28 | Weber        | 2006 | NA           | Germany     | DSC              | GE-EPI   | Edge, Marconi <sup>e</sup>              | 1.5T       | WHO NOS               | Prospective               | 9                  | 11                  | NA           | rCBVmax                                          | N                              | NA                                                     | Y                                                                  | 0.80 (0.50)                | 1.70 (0.90)                 | N                            |

**Note:**—AC indicates astrocytoma; OA, oligoastrocytoma; OD, oligodendroglioma; NOS, not otherwise specified; NA, not available; ID, identification; Y, yes; N, no; GE-EPI, gradient-echo-EPI; SE-EPI, spin-echo-EPI.

<sup>a</sup> Details of these studies are found in the on-line tables.

<sup>b</sup> Philips Healthcare, Best, the Netherlands.

<sup>c</sup> Erlangen, Germany.

<sup>d</sup> GE Healthcare, Milwaukee, Wisconsin.

<sup>e</sup> Marconi Medical Systems, Highland Heights, Ohio.

<sup>f</sup> Mouridsen K, Hansen MB, Ostergaard L, et al. **Reliable estimation of capillary transit time distributions using DSC-MRI.** J Cereb Blood Flow Metab 2014;34:151121. CrossRef Medline

**On-line Table 5: Individual patient data**

| Study    | WHO Grade | rCBVmax |
|----------|-----------|---------|
| Bisdas   | II        | 1.10    |
|          | II        | 2.10    |
|          | II        | 3.00    |
|          | II        | 4.80    |
|          | II        | 1.20    |
|          | II        | 6.20    |
|          | II        | 6.10    |
|          | II        | 2.90    |
|          | II        | 1.10    |
|          | II        | 5.60    |
|          | II        | 4.10    |
|          | II        | 1.00    |
|          | II        | 1.10    |
|          | II        | 1.30    |
|          | II        | 2.40    |
|          | III       | 1.20    |
|          | III       | 2.70    |
|          | III       | 6.20    |
|          | III       | 1.20    |
|          | III       | 2.20    |
| III      | 7.80      |         |
| III      | 1.50      |         |
| Boxerman | II        | 1.56    |
|          | II        | 1.46    |
|          | II        | 0.72    |
|          | II        | 1.39    |
|          | II        | 1.35    |
|          | II        | 3.35    |
|          | II        | 0.44    |
|          | II        | 1.61    |
|          | II        | 0.62    |
|          | III       | 3.44    |
|          | III       | 0.74    |
|          | III       | 5.63    |
|          | III       | 4.28    |
|          | III       | 2.42    |
|          | III       | 2.02    |
| III      | 2.18      |         |
| III      | 2.25      |         |
| III      | 2.63      |         |
| Falk     | II        | 1.41    |
|          | II        | 2.01    |
|          | II        | 4.23    |
|          | II        | 1.64    |
|          | II        | 1.87    |
|          | II        | 2.59    |
|          | II        | 1.71    |
|          | II        | 1.12    |
|          | II        | 1.54    |
|          | II        | 1.16    |
|          | II        | 1.08    |
|          | II        | 1.90    |
|          | II        | 1.28    |
|          | II        | 1.08    |
|          | II        | 2.09    |
|          | II        | 0.94    |
|          | II        | 1.30    |
|          | II        | 1.08    |
|          | III       | 5.76    |
|          | III       | 1.04    |
| III      | 1.91      |         |
| III      | 2.24      |         |
| III      | 5.13      |         |
| III      | 2.38      |         |
| III      | 1.90      |         |

Continued in next column

**On-line Table 5: Continued**

| Study    | WHO Grade | rCBVmax |
|----------|-----------|---------|
| Hakyemez | II        | 0.97    |
|          | II        | 1.73    |
|          | II        | 1.84    |
|          | II        | 0.98    |
|          | II        | 1.98    |
|          | II        | 1.46    |
|          | II        | 1.58    |
|          | II        | 1.55    |
|          | III       | 6.34    |
|          | III       | 3.74    |
| Kapoor   | III       | 7.64    |
|          | III       | 4.12    |
|          | II        | 1.95    |
|          | II        | 1.79    |
|          | II        | 1.14    |
|          | II        | 1.25    |
|          | II        | 3.55    |
|          | II        | 2.31    |
|          | II        | 3.03    |
|          | II        | 2.47    |
|          | II        | 2.96    |
|          | II        | 0.52    |
|          | II        | 2.59    |
|          | II        | 0.41    |
|          | II        | 0.89    |
|          | II        | 1.61    |
|          | III       | 1.83    |
|          | III       | 5.28    |
|          | III       | 3.71    |
|          | III       | 1.27    |
|          | III       | 2.08    |
|          | III       | 1.10    |
|          | III       | 5.57    |
|          | III       | 8.74    |
|          | III       | 3.20    |
| III      | 1.34      |         |
| III      | 1.28      |         |
| III      | 4.79      |         |
| III      | 1.40      |         |
| III      | 2.24      |         |
| III      | 5.04      |         |
| Lee      | II        | 1.79    |
|          | II        | 0.39    |
|          | II        | 3.85    |
|          | II        | 0.97    |
|          | III       | 5.11    |
|          | III       | 4.56    |
|          | III       | 3.67    |
|          | III       | 4.15    |
|          | III       | 3.40    |
|          | III       | 3.96    |
| III      | 3.46      |         |
| III      | 3.62      |         |
| III      | 3.78      |         |
| Maia     | II        | 0.77    |
|          | II        | 0.72    |
|          | II        | 0.70    |
|          | II        | 0.81    |
|          | II        | 0.65    |
|          | II        | 2.10    |
|          | II        | 1.20    |
|          | II        | 1.90    |
|          | II        | 0.82    |
|          | II        | 1.62    |
| II       | 1.88      |         |

Continued on next page

**On-line Table 5: Continued**

| Study | WHO Grade | rCBVmax |      |
|-------|-----------|---------|------|
| Preul | II        | 1.97    |      |
|       | II        | 2.99    |      |
|       | III       | 3.11    |      |
|       | III       | 3.08    |      |
|       | III       | 3.60    |      |
|       | III       | 3.90    |      |
|       | III       | 3.70    |      |
|       | III       | 3.80    |      |
|       | III       | 3.19    |      |
|       | II        | 1.10    |      |
|       | II        | 2.10    |      |
|       | II        | 0.60    |      |
|       | Sadeghi   | III     | 3.50 |
|       |           | III     | 5.50 |
|       |           | III     | 2.10 |
| III   |           | 4.40    |      |
| III   |           | 4.20    |      |
| III   |           | 3.90    |      |
| III   |           | 3.50    |      |
| III   |           | 6.00    |      |
| III   |           | 2.50    |      |
| III   |           | 2.30    |      |
| III   |           | 4.10    |      |
| III   |           | 5.60    |      |
| III   |           | 4.00    |      |
| II    |           | 1.93    |      |
| II    |           | 0.92    |      |
| II    | 1.81      |         |      |
| II    | 2.32      |         |      |
| II    | 3.82      |         |      |
| II    | 4.00      |         |      |
| II    | 1.41      |         |      |
| II    | 3.72      |         |      |
| III   | 8.50      |         |      |
| III   | 2.83      |         |      |
| III   | 2.50      |         |      |
| Saito | II        | 1.03    |      |
|       | II        | 1.86    |      |
|       | II        | 1.21    |      |
|       | II        | 5.60    |      |
|       | II        | 5.72    |      |
|       | II        | 4.02    |      |
|       | II        | 3.52    |      |
|       | II        | 4.63    |      |
|       | II        | 2.93    |      |
|       | II        | 5.12    |      |
|       | II        | 6.60    |      |
|       | II        | 6.19    |      |
|       | II        | 5.06    |      |
|       | III       | 2.12    |      |
|       | III       | 2.85    |      |
| III   | 2.03      |         |      |
| III   | 2.25      |         |      |
| III   | 5.00      |         |      |
| III   | 4.04      |         |      |
| III   | 4.22      |         |      |
| III   | 6.23      |         |      |
| III   | 6.46      |         |      |
| III   | 7.55      |         |      |
| III   | 6.23      |         |      |

**On-line Table 6: Data from cross-tabulation on 10 studies presenting individual patient data**

| Study ID | First Author, Year | TP | FN | FP | TN |
|----------|--------------------|----|----|----|----|
|          |                    |    |    |    |    |
| Study 2  | Boxerman 2006      | 8  | 1  | 1  | 8  |
| Study 3  | Falk 2014          | 6  | 1  | 4  | 14 |
| Study 4  | Hakyemez 2005      | 4  | 0  | 0  | 8  |
| Study 5  | Kapoor 2009        | 7  | 8  | 1  | 13 |
| Study 6  | Lee 2001           | 9  | 0  | 1  | 3  |
| Study 7  | Maia 2005          | 7  | 0  | 0  | 13 |
| Study 8  | Preul 2003         | 13 | 0  | 1  | 2  |
| Study 9  | Sadeghi 2006       | 1  | 2  | 0  | 8  |
| Study 10 | Saito 2012         | 4  | 7  | 1  | 12 |

**Note:**—TP, true-positive; FN, false-negative; FP, false-positive; TN, true-negative.
